1 Send proof to: Bruant Alexis, 3 allée du pomaret 38610 Gières France, 0632190266,  
2 bruant.alexis@gmail.com

3 **Effect of Foraging and Nest Defense tradeoffs on the Reproductive Success**  
4 **of Wood Storks (*Mycteria americana*)**

5 Alexis Bruant<sup>1</sup>, ORCID: 0000-0002-2999-2934, \*, Simona Picardi<sup>1</sup>, ORCID: 0000-0002-2623-6623,

6 Peter Frederick<sup>2</sup>, ORCID: 0000-0002-8098-9490, Mathieu Basille<sup>1</sup>, ORCID: 0000-0001-9366-7127

7 \* Corresponding author; Email : [bruant.alexis@gmail.com](mailto:bruant.alexis@gmail.com)

8 <sup>1</sup> Department of Wildlife Ecology and Conservation, Fort Lauderdale Research and Education  
9 Center, University of Florida, Davie, FL. 33314, USA

10 <sup>2</sup> Department of Wildlife Ecology and Conservation, P.O. Box 110430, University of Florida,  
11 Gainesville, FL. 32611, USA

12           Running title: PARENTAL CARE IN WOOD STORKS

13           **Abstract.**—In many species of birds, parental care is provided by both parents to  
14 maximize offspring survival, and there may be important trade-offs between  
15 maximizing food gathering and nest protection during the nesting period. The role  
16 of parental care in determining reproductive success was investigated in Wood  
17 Storks (*Mycteria americana*), and specifically how the trade-off between frequency  
18 and duration of foraging trips, and nest protection has contributed to the nesting  
19 outcome. Parental behavior of 85 pairs of Wood Storks was monitored throughout  
20 the nesting season in two breeding colonies in Palm Beach County, Florida. Wood  
21 Storks have gradually increased the frequency, but not the duration, of foraging  
22 trips as chicks developed. The ratio of hatchlings to fledglings was positively  
23 associated with the frequency of foraging trips during late chick development. Intra-  
24 specific aggressions resulting in nest takeovers have affected 32 % of the nests  
25 under study. Occurrence of nest takeovers have been higher for later-breeding pairs,  
26 and was happened primarily in the first few weeks of incubation, but was not  
27 affected by the degree of joint nest attendance of both parents. These results  
28 establish a functional link between parental effort and reproductive outcome in  
29 Wood Storks, and highlight the importance of frequent foraging trips, but not nest  
30 attendance, by parents.

31           **Key words.**—foraging trips, intra-specific aggressions, nest attendance, nest  
32 takeover, parental care

33 Any pre- or post-breeding investment made by a parent that increases offspring survival  
34 (parental care; Trivers 1972, Westneat and Sherman 1993, Royle *et al.* 2012), may affect re-  
35 productive success (Eggert *et al.* 1998). For many species of birds, including most waterbirds  
36 (Del Hoyo *et al.* 1992), biparental care is the rule (> 90%; Silver *et al.* 1985, Cockburn 2006,  
37 Harrison *et al.* 2009). The degree of parental care received by offspring can be crucial for their  
38 survival and, as a consequence, can affect the reproductive success of the parents (Elowe and  
39 Dodge 1989, Dijkstra *et al.* 1990, Boland *et al.* 1997). For instance, quality of parental care  
40 (body condition of parents), instead of quality of egg (egg size), has been shown to affect chick  
41 survival in Short-tailed Shearwaters (*Puffinus tenuirostris*; Meathrel *et al.* 1993).

42 Wood Stork's behavior such as incubation, brooding, number of feedings or nest protec-  
43 tion has been studied in several studies (Clark 1980, Bryan and Coulter 1991, Bryan *et al.* 2005),  
44 but the effect of Wood Stork's behavior on reproductive success has not been investigated yet.  
45 To our knowledge, no study has quantified the direct impact of food provisioning on survival  
46 of chicks in Wood Stork. In particular, altricial and semi-altricial hatchlings cannot feed them-  
47 selves, yet require a copious and steady flow of nutrients to fuel rapid growth and development  
48 (Schwagmeyer and Mock 2008). However, provisioning takes time and energy, and parents  
49 should trade off optimal levels of offspring provisioning versus nest defense (Mutzel *et al.*  
50 2013), clutch size (Dijkstra *et al.* 1990), clutch mass (Hébert and Barclay 1988), or parental  
51 body condition (Erikstad *et al.* 1997). Moreno *et al.* (1999) showed that increasing the intake  
52 of food positively affected reproductive success, but little is known about how the trade-off  
53 between food provisioning and nest protection impacts reproductive success.

54 In Wood Storks (*Mycteria americana*), both parents provide parental care (Kahl 1962,  
55 1971, US Fish and Wildlife Service 2001). Earlier studies suggest that daily care from both  
56 parents is strictly necessary to ensure survival of eggs and offspring in this species (Clark 1980,  
57 Bryan *et al.* 2005). Survival of nestling Wood Storks is affected by many factors, including  
58 predation (Rodgers 1987), human disturbance (Bouton *et al.* 2005), intraspecific aggression  
59 that can lead to nest takeover (Bryan and Coulter 1991), contamination with toxic chemicals  
60 (Fleming *et al.* 1984, Burger *et al.* 1993), as well as weather conditions, such as storms associ-  
61 ated with strong winds (Coulter and Bryan 1995, Bouton *et al.* 2005, Bryan and Robinette  
62 2008). However, the reproductive success of Wood Stork seems to be primarily related to prey  
63 availability in the environment (Ogden 1994, Griffin *et al.* 2008), which affects the ability of  
64 parents to provide sufficient food to sustain the development of chicks until fledging. Wood  
65 Storks feed mainly on fish (Kahl 1962, 1971, Ogden *et al.* 1976), captured in 15–50 cm deep

66 water (Coulter and Bryan 1993) using “tactolocation” (Kahl and Peacock 1963, Kahl 1964,  
67 Clark 1979). This technique is extremely sensitive to variations in fish availability. Sufficient  
68 rains prior to the breeding season are required to increase wetland water levels and increase  
69 prey population growth, followed by decreased water levels during the nesting phase to con-  
70 centrate prey and ensure efficient foraging when energetic needs are highest (Kushlan *et al.*  
71 1975, Ogden and Nesbitt 1979, Beerens *et al.* 2015). In contrast, heavy rains during the breed-  
72 ing season can result in colony abandonment due to dispersion of prey (Frederick and Collopy  
73 1989, Ramo and Busto 1992).

74 Biparental contributions to nest protection and food provisioning by Wood Storks have  
75 been confirmed in several studies (Kahl 1962, Coulter *et al.* 1999, Griffin *et al.* 2008). Wood  
76 Stork parents must budget their time efficiently to provide adequate food and at the same time  
77 protect their young in the first weeks after hatching, when chicks are unable to defend them-  
78 selves or to thermoregulate autonomously (Bryan and Coulter 1987). In this first phase, the  
79 continuous presence of a parent on the nest is necessary (Clark 1980, Bryan *et al.* 2005). After  
80 three weeks, chicks exhibit a behavioral change, becoming aggressive to any approach (con-  
81 specific and other species, Kahl 1971) and are able to thermoregulate (Clark 1980). This in-  
82 creased autonomy allows both parents to forage simultaneously when food requirements of the  
83 chicks are at their peak, leaving the nest unattended (Kahl 1962). Nestling Wood Storks remain  
84 in nests for 50 to 60 days before fledging (Kahl 1971, Coulter *et al.* 1999) and continue to return  
85 to nests to be fed by their parents for another one to three weeks (Kahl 1971, Borkhataria *et al.*  
86 2012).

87 The trade-off between nest attendance and food provisioning has been noted in many  
88 species of birds (Komdeur and Kats 1999, Fontaine and Martin 2006, Tilgar *et al.* 2010). A key  
89 assumption in this trade-off is that nest attendance is related to nest success, through several  
90 mechanisms, such as direct care for chicks, and defense of nest against predators and conspe-  
91 cifics (Giese 1996, Schmidt and Whelan 2005). To our knowledge, no study has investigated  
92 the relationship between parental care (measured as frequency of foraging trips, their duration,  
93 and nest attendance) and reproductive success in Wood Storks but has been in other wading  
94 birds (Miller and Burger 1978); likewise, the importance of parental attendance during the nes-  
95 tling period has been little studied in this group. Thus, our objective was to determine if parental  
96 care (nest attendance and foraging behavior) varies during the nesting season and, if so, if such  
97 variation affects reproductive success. We predicted that the number of parental foraging trips  
98 would increase with the age of chicks, and the mean duration of foraging trips would decrease.

99 We also predicted a positive relationship between number of foraging trips and reproductive  
100 success. Second, we assessed a possible relationship between the time spent by parents at the  
101 nest and the occurrence of takeover events. We predicted that the percentage of time spent at  
102 the nest simultaneously by both parents would reduce the likelihood of takeovers.

## 103 METHODS

### 104 Study areas

105 We collected data on parental activities of 85 pairs of Wood Storks on 61 nests (due to  
106 takeovers and abandoned nests) in two colonies in Palm Beach County, Florida. We observed  
107 32 nests on two islands located within the Wakodahatchee Wetlands (26°47'87"N,  
108 80°14'34"W), nesting on pond apple (*Annona glabra*), dahoon holly (*Ilex cassine*), and sabal  
109 palm (*Sabal palmetto*) (Bays *et al.* 2000). We also monitored 29 nests in pond apple and sabal  
110 palm in the BallenIsles Country Club, situated on a single island within a golf club  
111 (26°83'01"N, 80°10'91"W), located 46.6-km north of Wakodahatchee Wetlands (Fig. 1). It is  
112 important to note that Palm Beach County and the large adjacent protected marsh lands (includ-  
113 ing Loxahatchee National Wildlife Refuge) are a hotspot for the year-round distribution of res-  
114 ident wood storks, which may indicate that foraging habitat is generally good in this area (Pi-  
115 cardì *et al.* 2020). The 2017 breeding season in Palm Beach County was characterized by lower  
116 precipitation (2,68 mm in January and February, 5,26 mm in March through May) than the  
117 long-term average (9,33 mm for December through February 1981-2010, 12,76 mm for March-  
118 May 1981-2010; data from the National Oceanic and Atmospheric Administration).

### 119 Data collection

120 We observed breeding behavior in the two colonies from January 31<sup>st</sup> to June 2<sup>nd</sup>, 2017.  
121 Two observers conducted separate two 5h-long surveys biweekly at each colony, once in the  
122 morning (07:30 hr to 12:30 hr) and once in the afternoon (12:30 hr to 17:30 hr), as to homoge-  
123 nize time gaps between successive surveys at a single site (every 3.5 days, Monday morning  
124 and Thursday afternoon at BallenIsles, Tuesday morning and Friday afternoon at Wakoda-  
125 hatchee Wetlands). At each site, two groups of nests were observed in weekly alternation by  
126 both observers to prevent observer bias. Wood Stork behavior was observed using binoculars  
127 (12×50) and recorded using an SLR camera with a 600-mm telephoto lens. We began data  
128 collection when most pairs of Wood Storks were either building nests or beginning to incubate  
129 eggs. We identified each individual Wood Stork based on unique skin patterns on their head,

130 which are individually unique (Clark 1980, Bryan and Coulter 1991). We built a photographic  
131 database for individual identification, consisting of photos of the right and left profile of each  
132 stork. Because Wood Storks lack evident sexual dimorphism, sexing partners of a pair was only  
133 possible when we witnessed copulation (Clark 1980, Fujioka and Yamagishi 1981, Bryan and  
134 Coulter 1991).

135 At the beginning of each survey, we recorded the status of each nest (construction, in-  
136 cubation or post-hatching, individual parents present), took pictures of the individuals present,  
137 and recorded arrivals and departures. Identification was always made later using the photo da-  
138 tabase. The takeovers were either observed directly or inferred from the data showing the pres-  
139 ence of different adults in the nest. A takeover can be carried out by a single individual or by a  
140 pair who are seizing an already built nest. This may result in the cessation of egg incubation or  
141 the death of the original pairs' chicks present in the nest at the time of the takeover. Trips were  
142 categorized as foraging or gathering nest building material based on whether the parents regur-  
143 gitated food to nestlings upon return, or brought back twigs and other woody material, respec-  
144 tively. Trips were initially classified as unknown when parents neither fed nor carried nest ma-  
145 terial when returning. We found that 96% of foraging trips (showing regurgitation) lasted more  
146 than 44 min. Using that information, we categorized any unknown trips longer than 44 min as  
147 foraging trips. Laying dates for each nest were estimated by back-dating from hatching dates,  
148 using an average incubation period of 28 days (Rodgers and Schwikert 1997) and were matched  
149 to observations of parental brooding behavior (especially sitting position). We counted hatch-  
150 lings in each nest where visual counting was feasible. We estimated reproductive success at  
151 each nest as the proportion of hatching chicks still alive after 8 weeks, i.e. the estimated time  
152 when young birds leave the nest for the first time (Middleton and Prigoda 2001, Bryan *et al.*  
153 2005). We determined early and late pairs according to their nesting date. Most pairs (48 out of  
154 61) initiated nesting within the first week of study, before February 8, 2017, and were consid-  
155 ered early nesters. A second wave initiated nesting between February 20, 2017, and April 21,  
156 2017 and were considered late nesters.

## 157 Analytical Methods

### 158 Changes in frequency and duration of foraging trips

159 We modeled both frequency and duration of foraging trips as non-linear functions of  
160 weeks since hatching using generalized linear mixed models (Mirman 2014). The overall shape  
161 of the curve was captured with inclusion of orthogonal polynomials on time up to the fourth

162 order, with individual-within-nest random effects on all terms (for frequency only; for the du-  
163 ration analysis, the use of complete trips with known time of departure and arrival limited the  
164 sample size, and the estimation of random effects was not possible). Using a subset of individ-  
165 uals of known sex, sex differences were tested with the inclusion of an additive and multiplica-  
166 tive fixed effect of sex. Similarly, we included an additive and multiplicative fixed effect of the  
167 calendar date of nest initiating to test its effect on frequency and duration of foraging trip.

#### 168 Effect of frequency of foraging trips on reproductive success ratio

169 The effect of frequency of foraging trips on reproductive success was then assessed us-  
170 ing a logistic regression on the number of successes (fledglings) over failures (hatchlings that  
171 did not survive until fledging) in each nest. Fixed effects of the frequency of foraging trips  
172 during the early pre-flight stage (weeks 1–4) and during the late pre-flight stage (weeks 5–8)  
173 were included in the regression, after checking for their correlation. We have not reported re-  
174 sults for the post-flight stage because the data were not sufficient to constitute a robust data set.  
175 In fact, at the end of the young's development (between 9 and 12 weeks), parents return very  
176 little to the nest to feed them. It happened several times that the parents did not return to the  
177 nest during the 5.5 hours of observation.

#### 178 Nest attendance and risk of takeover

179 We fit semi-parametric proportional hazards (SPPH) models to the time spent by parents  
180 at the nest prior to takeovers, expressed either as a function of calendar time, or time within the  
181 nest cycle. The instantaneous risk of successful takeover of a nest at a given week was modeled  
182 as a function of the baseline hazard experienced by all individuals, and the proportion of time  
183 with at least one adult or two adults present at the nest during the week. In the semi-parametric  
184 approach, weak assumptions about the baseline hazard are made, allowing the estimation of the  
185 relative risk of takeover. Covariate effects are then estimated using a partial likelihood that does  
186 not require estimating the baseline hazard.

187 All statistical analyses were performed in the software R 3.3.0 (R Core Team 2017)  
188 using notably the packages “lme4” (version 1.1.13; Bates *et al.* 2015), “survival” (version  
189 2.40.1; Therneau and Grambsch 2000), and “cowplot” for graphs (version 0.7.0; Wilke 2016).

190

## RESULTS

### 191 Wood Stork monitoring

192 Observations from the two sites were similar. For instance, comparing the two sites we  
193 obtained an average foraging rate of  $0.243 \text{ h}^{-1}$  for BallenIsles Country Club versus  $0.239 \text{ h}^{-1}$  for  
194 Wakodahatchee Wetlands. Moreover, the pairs with the highest chick survival were those with  
195 the highest mean frequency of foraging trips per hour in each site. We thus pooled both colonies  
196 to increase robustness of our results. Between January 31<sup>st</sup> and June 2<sup>nd</sup> 2017, we monitored 61  
197 nests (29 in BallenIsles, and 32 in Wakodahatchee Wetlands), corresponding to 85 nesting at-  
198 tempts from individually identifiable pair of Wood Stork (with sex identified for individuals of  
199 71 pairs). Of these nest attempts, 27 were taken over by another pair, five were abandoned, and  
200 53 either succeeded or were still active at the end of data collection (Fig. 2). Among surviving  
201 nests, we were able to track the fate of chicks until fledging for 29 nest attempts (see Table 1).  
202 For the other nest attempts, we were not able to track the fate of chicks until fledging due to  
203 either takeover, death of chicks, abandoned nest or the end of the observation period. We found  
204 an average of  $3.00 \pm 0.46$  SD hatchlings per nest, and an average of  $2.59 \pm 0.57$  SD chicks  
205 fledged per nest.

### 206 Changes in frequency and duration of foraging trips

207 Adding orthogonal polynomials successively to the constant model of frequency of for-  
208 aging trip significantly improved the fit until the quadratic term ( $\chi^2(7) = 14.792$ ,  $P = 0.039$ ;  
209 Table 2A), whereas adding a cubic or quartic term did not further improve the fit further (resp.  
210  $\chi^2(1) = 1.011$ ,  $P = 0.315$ ;  $\chi^2(6) = 0.607$ ,  $P = 0.436$ ; Table 2A). Using the quadratic model as a  
211 baseline, model selection revealed that an additive or multiplicative effect either sex (Table 2B)  
212 or initiation date (Table 2C) did not significantly improve the fit (Table 2B). The model includ-  
213 ing the effect of first- and second-order polynomials was kept for the rest of analyses (Table 3).  
214 This model showed a significant effect of the first-order orthogonal polynomial term ( $0.225 \pm$   
215  $0.06$ ,  $t_{910} = 13.501$ ,  $P < 0.001$ ; Table 3) demonstrating a positive linear relationship between the  
216 frequency of foraging trips and the progression of chick development (Fig. 3A).

217 Adding orthogonal polynomials to the constant model of duration of foraging trip did not sig-  
218 nificantly improve the fit (all  $P > 0.05$ ; Table 4A), although the first-order polynomial was  
219 close to statistical significance ( $F_{1,155} = 3.612$ ,  $P = 0.059$ ; Table 4A). We thus simplified the  
220 baseline foraging duration model as a simple linear model including a main effect of the number  
221 of weeks since hatching. Using the simple linear model as a baseline, model selection then



222 showed that the additive or multiplicative effect of sex (Table 4B) and initiation date (Table  
223 4C) did not significantly improve the fit. The simple linear model including no effect of sex or  
224 start time of nesting was thus kept for the rest of analyses, and indicated a weak trend of de-  
225 creasing duration of foraging trips through time since hatching ( $-2.629 \pm 1.388$ ,  $t_{27} = -1.893$ ,  
226  $P = 0.060$ ; Table 5; Fig. 3B).

#### 227 Effect of frequency of foraging trips on reproductive success

228 We divided the post-hatching phase into three stages: early pre-flight (weeks 1–4 post-  
229 hatching), late pre-flight (weeks 5–8) and post-flight (weeks 9–12; Clark 1980). The frequency  
230 of foraging trips increased during each stage of chick development. However, the effect of the  
231 frequency of foraging trips on reproductive success was not significant during the early pre-  
232 flight stage (weeks 1–4;  $Z = 1.025$ ;  $P = 0.306$ ; Table 6). Frequency of foraging trips during the  
233 late pre-flight stage had a significant positive effect on reproductive success ( $Z = 2.929$ ;  $P =$   
234  $0.003$ ; Table 6; Fig. 4). The frequency of foraging trips had no effect on the absolute number  
235 of fledglings ( $Z = 1.035$ ;  $P = 0.438$ ). Pairs with the highest chick survival ( $P = 1$ ) were those  
236 with the highest mean frequency of foraging trips per hour ( $0.25$  to  $0.35 \text{ h}^{-1}$ ), whereas pairs with  
237 the lowest chick survival ( $P = 0.5$ ) had the lowest mean frequency of foraging trips per hour  
238 ( $0.12$  to  $0.16 \text{ h}^{-1}$ ). The mean frequency of foraging trips during the early and late pre-flight  
239 stages were not correlated ( $r = 0.216$ ,  $t_{27} = 1.148$ ,  $P = 0.261$ ).

#### 240 Nest attendance and risk of takeover

241 Both adults of each pair were simultaneously present at nests more than half of the time  
242 during nest building and the first week of incubation, but, this proportion declined rapidly dur-  
243 ing incubation (Fig. 5A). Until the beginning of the early pre-flight stage, at least one adult was  
244 always constantly at the nest. Then, the presence of even one adult gradually decreased, reach-  
245 ing a minimum of 10% of the time at the end of the nesting season (Fig. 5A). In our study, 32%  
246 of nests experienced a takeover. Of the 27 takeovers, the vast majority took place in Wakoda-  
247 hatchee Wetlands (26) vs. only 1 in Ballen Isles. Most takeovers occurred between February 13  
248 to March 19 2017 (Fig. 5B). However, we found that the amount of time with presence of at  
249 least one parent at the nest did not significantly affect risk of successful takeovers ( $e^{\beta} = 1.030$ ,  
250  $Z = 1.289$ ;  $P = 0.197$ ; Table 7), whereas a higher presence of both parents at the nest had a  
251 significant positive effect on the risk of takeover ( $e^{\beta} = 1.017$ ;  $Z = 2.506$ ;  $P = 0.012$ ; Table 7).  
252 Similarly, the date of initiation of incubation had a positive effect on the risk of takeovers, with  
253 later initiation dates associated with higher risk ( $e^{\beta} = 2.135$ ;  $Z = 1.971$ ;  $P = 0.048$ ; Table 7; Fig.  
254 5C).

255

## DISCUSSION

256

257

258

259

260

261

262

263

264

265

266

267

268

269

270

271

272

273

274

We found that the mean frequency of foraging trips per hour showed a gradual increase in time with the developmental stage of chicks. However, our sample of chicks in the post-flight stage was small and highly variable among different pairs, thus limiting our inference during the final stage. The duration of foraging trips was not influenced by the developmental stage of chicks. These results are in general agreement with those of previous studies of Wood Storks (Clark 1980, Bryan *et al.* 1995, 2005). Parents meet the increased energetic needs of chicks (Kahl 1962) by increasing the number rather than the duration of foraging trips (Bryan *et al.* 1995). During the post-hatching phase, the mean frequency of foraging trips per hour and their duration were not different between the sexes, and were not related to the onset date of incubation. Whether or not the duration of foraging trips is always stable as chicks grow is unclear, but may depend on the mosaic of wetland conditions in the area surrounding at colony (Coulter and Bryan 1993, Bryan *et al.* 1995). The dry season was not interrupted by major rainfall events that could reverse gradual water drydown, and this resulted in good conditions for wood stork foraging in our study area (Kushlan 1986). However, precipitation in summer 2016 were lower (7,7 mm) than the long-term average (22,01 mm) in Palm Beach County. High water levels in the prior non-breeding season promote growth of fish populations (DeAngelis *et al.* 2010, Botson *et al.* 2016), so it is possible that the low levels observed in 2016 prevented foraging conditions from reaching optimality in 2017, despite the favorable trends of water recession during the breeding season.

275

276

277

278

279

280

281

282

283

284

285

286

We found that the mean rate of foraging trips in the late pre-flight stage, but not in the early pre-flight stage, affected the proportion of chicks that fledged. Although our results showed that pairs with the highest chick survival were those with the highest mean frequency of foraging trips per hour and that pairs with the lowest chick survival had the lowest mean frequency of foraging trips per hour, it is important to note the possible circularity of this relationship: in fact, one could argue that pairs that reached the late pre-flight stage with an already reduced brood size consequently decreased the frequency of trips due to reduced demands from the offspring, rather than the other way around. However, our results show that the relationship between reproductive success and frequency of foraging trips is independent of the absolute number of fledglings. For example, pairs with two successful chicks but low fledging success had either higher (0.23–0.28 h<sup>-1</sup> for success ratio of 0.67, see Fig. 2) or lower (0.13–0.16 h<sup>-1</sup> for success ratio of 0.5, see Fig. 4) foraging trip frequency than those with 100 % success ratio

287 (0.17–0.23 h<sup>-1</sup>, see Fig. 4). If the absolute number of chicks was driving the frequency of for-  
288 aging trips, we would expect the same frequency for an equal number of chicks independently  
289 from the initial brood size. This result supports an effect of foraging trip frequency in determin-  
290 ing chick survival ratio, and not vice-versa. Because we found no effect of the frequency of  
291 foraging trips on the absolute number of fledglings, fledging success is apparently determined  
292 by other factors, such as mortality related to predation, sibling competition, or disturbance, as  
293 well as factors affecting clutch size (Burger 1982, Rodgers 1987, Bouton *et al.* 2005).

294 Takeover behavior appears to be widespread in Wood Storks, where it may affect more  
295 than a third of pairs in a colony (Bryan and Coulter 1991). In our study, 32% of nests experi-  
296 enced a takeover. The risk of a takeover was more than double for late pairs (nest initiation after  
297 February 13<sup>th</sup>). The lower occurrence of takeovers for early pairs could be explained by better  
298 intrinsic characteristics of individuals (Johnson and Kermott 1990) such as larger size, higher  
299 energy reserves, greater aggressiveness, or higher social status (i.e. dominance hierarchy rank).  
300 We also found that the time of simultaneous nest attendance by both parents did not reduce the  
301 occurrence of takeovers. On the contrary, and surprisingly, pairs with greater nest attendance  
302 times by both individuals had a greater chance of undergoing a takeover. Because Bryan and  
303 Coulter (1991) found that all takeovers occurred when a single individual was present at a nest,  
304 we expected that pairs that spent more time together at the nest would have a lower chance of  
305 getting their nest taken over, but, instead, we found that the presence of both individuals was  
306 associated with a greater risk of undergoing a takeover. Pairs may increase joint attendance  
307 when their perceived risk of attack is greater, but we have no data to test this possible explana-  
308 tion. In any case, increased parental attendance did not result in reduced risk of nest failure,  
309 suggesting that there may not be a clear trade-off between attendance and time spent foraging.  
310 Perhaps attendance of both parents at the nest does not provide appropriate protection against  
311 takeovers, and body condition of parents may be a determining factor as shown in the study by  
312 Meathrel *et al.* (1993) in Short-tailed Shearwaters.

313 Wood Storks have long breeding cycles (~110 days), and are often limited by food avail-  
314 ability at the end of the dry season (Kushlan *et al.* 1975). Our results suggest that the frequency  
315 of foraging trips during the late pre-flight stage is positively associated with the reproductive  
316 success of Wood Storks. To our knowledge, this is the first time a link is established between  
317 parental effort and reproductive success for this species. Moreover, our findings highlighted an  
318 important mechanism of nest failure, nest takeovers, and that the risk associated with it varies  
319 throughout the season. Thus, in addition to constraints related to seasonal water level fluctua-  
320 tions, a late nesting initiation can be associated to low reproductive success due to a higher

321 probability of takeover events. It is important to point out that we have one season of data and  
322 that the reproductive success of Wood Stork is primarily related to prey availability in the en-  
323 vironment (Ogden 1994, Griffin *et al.* 2008). This food availability is important for the devel-  
324 opment of chicks until fledging. Thus, a study carried out over several breeding seasons in the  
325 same location could provide more accurate breeding estimates as foraging conditions are a dy-  
326 namic system component.

## 327 ACKNOWLEDGMENTS

328 We are grateful to Gary Myers and the management office of BallenIsles Country Club  
329 and to Robert Nelton and the Palm Beach County Water Utilities Department for granting us  
330 access to their premises. Gary Ritchison provided valuable feedback on an earlier version of  
331 this manuscript. This work was supported by the USDA National Institute of Food and Agri-  
332 culture (Hatch project 1009101).

## 333 LITERATURE CITED

- 334 Bates, D., M. Maechler, B. Bolker and S. Walker. 2015. Fitting Linear Mixed–Effects Models  
335 Using lme4. *Journal of Statistical Software* 67: 1–48.
- 336 Bays, J., G. Dernlan, H. Hadjimiry, K. Vaith and C. Keller. 2000. Treatment Wetlands for Mul-  
337 tiple Functions: Wakodahatchee Wetlands, Palm Beach County, Florida. *Proceedings of the*  
338 *Water Environment Federation* 2000: 15–37.
- 339 Beerens, J. M., P. C. Frederick, E. G. Noonburg and D. E. Gawlik. 2015. Determining habitat  
340 quality for species that demonstrate dynamic habitat selection. *Ecology and evolution* 5:  
341 5685–5697.
- 342 Boland, C. R., R. Heinsohn and A. Cockburn. 1997. Experimental manipulation of brood re-  
343 duction and parental care in cooperatively breeding white-winged choughs. *Journal of Ani-  
344 mal Ecology* 66: 683–691.
- 345 Borkhataria, R. R., P. C. Frederick, R. A. Keller and J. A. Collazo. 2012. Temporal variation in  
346 local wetland hydrology influences postdispersal survival of juvenile Wood Storks (*Mycte-  
347 ria americana*). *Auk* 129: 517–528.
- 348 Botson, B. A., D. E. Gawlik and J. C. Trexler. 2016. Mechanisms that generate resource pulses  
349 in a fluctuating wetland. *PloS one* 11: e0158864.
- 350 Bouton, S. N., P. C. Frederick, C. D. Rocha, A. T. Barbosa Dos Santos and T. C. Bouton. 2005.  
351 Effects of tourist disturbance on Wood Stork nesting success and breeding behavior in the  
352 Brazilian Pantanal. *Waterbirds* 28: 487–497.
- 353 Bryan, A. L. and M. C. Coulter. 1987. Foraging flight characteristics of Wood Storks in east-  
354 central Georgia, USA. *Colonial Waterbirds* 10: 157–161.

- 355 Bryan, A. L. and M. C. Coulter. 1991. Conspecific aggression in a Wood Stork colony in Georgia. *Wilson Bulletin* 103: 693–697.  
356
- 357 Bryan, A. L., M. C. Coulter and C. J. Pennycuik. 1995. Foraging strategies and energetic costs  
358 of foraging flights by breeding Wood Storks. *Condor* 97: 133–140.
- 359 Bryan, A. L., J. W. Snodgrass, J. R. Robinette and L. B. Hopkins. 2005. Parental activities of  
360 nesting Wood Storks relative to time of day, tide level and breeding stage. *Waterbirds* 28:  
361 139–145.
- 362 Bryan, A. L. and J. R. Robinette. 2008. Breeding success of Wood Storks nesting in Georgia  
363 and South Carolina. *Waterbirds* 31: 19–24.
- 364 Burger, J. 1982. An overview of proximate factors affecting reproductive success in colonial  
365 birds: concluding remarks and summary of panel discussion. *Colonial Waterbirds* 5: 58–65.
- 366 Burger, J., J. A. Rodgers and M. Gochfeld. 1993. Heavy metal and selenium levels in endan-  
367 gered wood storks *Mycteria americana* from nesting colonies in Florida and Costa Rica.  
368 *Archives of Environmental Contamination and Toxicology* 24: 417–420.
- 369 Clark, E. S. 1979. Factors affecting the initiation and success of nesting in an East–Central  
370 Florida Wood Stork colony. *Proceedings of the Colonial Waterbird Group* 2: 178–188.
- 371 Clark, E. S. 1980. The attentiveness and time budget of a pair of nesting Wood Storks. *Pro-  
372 ceedings of the Colonial Waterbird Group* 3: 204–215.
- 373 Cockburn, A. 2006. Prevalence of different modes of parental care in birds. *Proceedings of the  
374 Royal Society B* 273: 1375–1383.
- 375 Coulter, M. C. and A. L. Bryan. 1993. Foraging ecology of wood storks (*Mycteria americana*)  
376 in east central Georgia: Characteristics of foraging sites. *Colonial Waterbirds* 16: 59–70.
- 377 Coulter, M. C. and A. L. Bryan. 1995. Factors affecting reproductive success of Wood Storks  
378 (*Mycteria americana*) in East–Central Georgia. *Auk* 112: 237–243.
- 379 Coulter, M. C., J. A. Rodgers, J. C. Ogden and F. C. Depkin. 1999. Wood Stork . In: Poole, A.,  
380 Gill, F. (Eds.), *Birds of North America*, No. 409: 1–28. The Birds of North America, Inc.,  
381 Philadelphia, PA.
- 382 DeAngelis, D. L., J. C. Trexler, C. Cosner, A. Obaza, and F. Jopp. 2010. Fish population dy-  
383 namics in a seasonally varying wetland. *Ecological Modelling* 221: 1131–1137.
- 384 Del Hoyo, J., A. Elliott and J. Sargatal. 1992. *Handbook of the Worlds* 1.
- 385 Dijkstra, C., A. Bult, S. Bijlsma, S. Daan, T. Meijer and M. Zijlstra. 1990. Brood size manipu-  
386 lations in the kestrel (*Falco tinnunculus*): effects on offspring and parent survival. *Journal  
387 of Animal Ecology* 59: 269–285.
- 388 Dubois, F., F. Cézilly and M. Pagel. 1998. Mate fidelity and coloniality in waterbirds: a com-  
389 parative analysis. *Oecologia* 3: 433–440.

- 390 Eggert, A. K., M. Reinking and J. K. Müller. 1998. Parental care improves offspring survival  
391 and growth in burying beetles. *Animal Behaviour* 55: 97–107.
- 392 Elowe, K. D. and W. E. Dodge. 1989. Factors affecting black bear reproductive success and  
393 cub survival. *Journal of Wildlife Management* 53: 962–968.
- 394 Erikstad, K. E., M. Asheim, P. Fauchald, L. Dahlhaug, T. Tveraa and P. Dahlhaug. 1997. Ad-  
395 justment of parental effort in the puffin; the roles of adult body condition and chick size. *Be-  
396 havioral Ecology and Sociobiology* 40: 95–100.
- 397 Fleming, W. J., J. A. Rodgers and C. J. Stafford. 1984. Contaminants in Wood Stork eggs and  
398 their effects on reproduction, Florida, 1982. *Colonial Waterbirds* 7: 88–93.
- 399 Fontaine, J. J. and T. E. Martin. 2006. Parent birds assess nest predation risk and adjust their  
400 reproductive strategies. *Ecology Letters* 9: 428–434.
- 401 Frederick, P. C. and M. W. Collopy. 1989. Nesting success of five Ciconiiform species in rela-  
402 tion to water conditions in the Florida Everglades. *Auk* 106: 625–634.
- 403 Fujioka, M. and S. Yamagishi. 1981. Extramarital and pair copulations in the Cattle Egret. *Auk*  
404 98: 134–144.
- 405 Giese, M. 1996. Effects of human activity on Adelie penguin *Pygoscelis adeliae* breeding suc-  
406 cess. *Biological Conservation* 75: 157–164.
- 407 Griffin, G., J. Morris, J. Rodgers and B. Snyder. 2008. Changes in Wood Stork (*Mycteria amer-  
408 icana*) nestling success observed in four Florida bird colonies during the 2004, 2005, and  
409 2006 breeding seasons. *Acta Zoologica Academiae Scientiarum Hungaricae* 54: 123–130.
- 410 Harrison, F., Z. Barta, I. Cuthill and T. Székely. 2009. How is sexual conflict over parental care  
411 resolved? A meta-analysis. *Journal of Evolutionary Biology* 22: 1800–1812.
- 412 Hébert, P. N. and R. M. Barclay. 1988. Parental investment in Herring Gulls: clutch apportion-  
413 ment and chick survival. *Condor* 90: 332–338.
- 414 Johnson, L. S. and L. H. Kermott. 1990. Possible causes of territory takeovers in a north-tem-  
415 perate population of House Wrens. *Auk* 107: 781–784.
- 416 Kahl, M. P. 1962. Bioenergetics of Growth in Nestling Wood Storks. *Condor* 64: 169–183.
- 417 Kahl, M. P. and L. J. Peacock. 1963. The bill-snap reflex: a feeding mechanism in the American  
418 Wood Stork. *Nature* 199: 505.
- 419 Kahl, M. P. 1964. Food ecology of the Wood Stork (*Mycteria americana*) in Florida. *Ecological  
420 Monographs* 34: 97–117.
- 421 Kahl, M. P. 1971. Comparative ethology of the Ciconiidae. The Wood-Storks (genera *Mycteria*  
422 and *Ibis*). *Ibis* 114: 15–29.

- 423 Komdeur, J. and R. K. Kats. 1999. Predation risk affects trade-off between nest guarding and  
424 foraging in Seychelles Warblers. *Behavioral Ecology* 10: 648–658.
- 425 Kushlan, J. A., J. C. Ogden. and A. L. Higer. 1975. Relation of water level and fish availability  
426 to wood stork reproduction in the southern Everglades, Florida. U.S. Geological Survey  
427 Open File Rep: 75–434.
- 428 Kushlan, J. A. 1986. Responses of wading birds to seasonally fluctuating water levels: strategies  
429 and their limits. *Colonial Waterbirds* 9: 155–162.
- 430 Meathrel, C. E., J. S. Bradley, R. D. Wooller and I. J. Skira. 1993. The effect of parental con-  
431 dition on egg-size and reproductive success in Short-tailed Shearwaters *Puffinus tenuiros-*  
432 *tris*. *Oecologia* 93: 162–164.
- 433 Middleton, A. L. and E. Prigoda. 2001. What does ‘fledging’ mean?. *Ibis*. 143: 296–298.
- 434 Miller, L. M. and J. Burger. 1978. Factors affecting nesting success of the Glossy Ibis. *Auk* 95:  
435 353–361.
- 436 Mirman, D. 2014. Growth curve analysis and visualization using R. In Chapman and Hall /  
437 CRC: 170.
- 438 Moreno, J., J. P. Veiga, P. J. Cordero and E. Mínguez. 1999. Effects of paternal care on repro-  
439 ductive success in the polygynous Spotless Starling *Sturnus unicolor*. *Behavioral Ecology*  
440 and *Sociobiology* 47: 47–53.
- 441 Mutzel, A., M. P. Blom, F. Spagopoulou, J. Wright, N. J. Dingemanse and B. Kempenaers.  
442 2013. Temporal trade-offs between nestling provisioning and defence against nest predators  
443 in Blue Tits. *Animal behaviour* 85: 1459–1469.
- 444 Ogden, J. C., J. A. Kushlan and J. T. Tilmant. 1976. Prey selectivity by the Wood Stork. *Condor*  
445 78: 324–330.
- 446 Ogden, J. C. 1978. Recent population trends of colonial wading birds on the Atlantic and Gulf  
447 coastal plains. In A. Sprunt IV, J. C. Ogden, and S. Winkler, editors. *Wading birds*. National  
448 Audubon Society Research Report 7: 135–153.
- 449 Ogden, J. C. and S. A. Nesbitt. 1979. Recent Wood Stork population trends in the United States.  
450 *Wilson Bulletin* 91: 512–523.
- 451 Ogden, J. C. 1994. A comparison of wading bird nesting colony dynamics (1931-1946 and  
452 1974-1989) as an indication of ecosystem conditions in the southern Everglades. St. Lucie  
453 Press, Boca Raton, FL: 533–570.
- 454 Picardi, S., P. C. Frederick, R. R. Borkhataria, and M. Basille. 2020. Partial migration in a  
455 subtropical wading bird in the southeastern United States. *Ecosphere* 11: e03054.
- 456 Ramo, C. and B. Busto. 1992. Nesting failure of the Wood Stork in a neotropical wetland.  
457 *Condor* 94: 777–781.

- 458 R Core Team. 2017. R: A language and environment for statistical computing. R Foundation  
459 for Statistical Computing, Vienna, Austria. URL: <https://www.r-project.org/>
- 460 Rodgers, J. A. 1987. On the antipredator advantages of coloniality: A Word of Caution. *Wilson*  
461 *Bulletin* 99: 269–271.
- 462 Rodgers, J. A. and S. T. Schwikert. 1997. Breeding success and chronology of Wood Storks  
463 *Mycteria americana* in northern and central Florida, U.S.A. *Ibis* 139: 76–91.
- 464 Royle, N. J., P. T. Smiseth and M. Köllike. 2012. What is parental care? In: The evolution of  
465 parental care (eds. Royle NJ, Smiseth, PT, Kölliker M): 1–14. Oxford University Press.
- 466 Schmidt, K. A. and C. J. Whelan. 2005. Quantifying male Wood Thrush nest-attendance and  
467 its relationship to nest success. *Condor* 107: 138–144.
- 468 Schwagmeyer, P. L. and D. W. Mock. 2008. Parental provisioning and offspring fitness: size  
469 matters. *Animal Behaviour* 75: 291–298.
- 470 Silver, R., H. Andrews and G. F. Ball. 1985. Parental care in an ecological perspective: a quan-  
471 titative analysis of avian subfamilies. *American Zoologist* 25: 823–840.
- 472 Therneau, T. M. and P. M. Grambsch. 2000. The cox model. In modeling survival data: extend-  
473 ing the Cox model: 39–77. Springer New York.
- 474 Tilgar, V., K. Moks and P. Saag. 2010. Predator-induced stress changes parental feeding be-  
475 havior in pied flycatchers. *Behavioral Ecology* 22: 23–28.
- 476 Trivers, R. L. 1972. Parental investment and sexual selection. In *Sexual Selection and the De-*  
477 *scendent of Man 1871–1971* (B. Campbell, ed): 136–179.
- 478 US Fish and Wildlife Service [FWS]. 2001. Wood Stork conservation and management for  
479 landowners. U.S. Fish and Wildlife Service; Georgia.
- 480 Westneat, D. F. and P. W. Sherman. 1993. Parentage and the evolution of parental behavior.  
481 *Behavioral Ecology* 4: 66–77.
- 482 Wilke, C. O. 2016. Cowplot: streamlined plot theme and plot annotations for ggplot2. R pack-  
483 age version 0.7.0. <https://cran.r-project.org/web/packages/cowplot/index.html>

## 484 Supplemental Material

485 **Plate 1.** An adult Wood Stork (*Mycteria americana*) attending its nest, with a three-weeks old  
486 nestling. Study of nest attendance over time showed it had not effect on the risk of conspecific  
487 taking over the nest, and ultimately on nest success.



488 Tables

489 **Table 1. Reproductive success for 29 Wood Stork (*Mycteria Americana*) nests with known**  
490 **outcome in south Florida: Number of nests broken down by the number of chicks per nest**  
491 **at the time of hatching (rows) and at the time of fledging (columns).**

| # Hatchlings \ # Fledgings | 1 | 2  | 3  | Total |
|----------------------------|---|----|----|-------|
| 2                          | 1 | 2  | 0  | 3     |
| 3                          | 0 | 5  | 18 | 23    |
| 4                          | 0 | 3  | 0  | 3     |
| Total                      | 1 | 10 | 18 | 29    |

492 **Table 2. Model selection for frequency of foraging trips by Wood Storks (*Mycteria Amer-***  
 493 ***icana*). *K* is the number of parameters in the model; AIC the Akaike Information Crite-**  
 494 **tion, LL the log-likelihood, and  $\chi^2$ , df and  $\text{Pr}(>\chi^2)$  indicates the statistic, the associated**  
 495 **degrees of freedom and *p*-value for the comparison between each model and the previous**  
 496 **one. The selected model is indicated in bold.**

| <i>General shape</i>                       |           |                |               |               |          |                      |
|--------------------------------------------|-----------|----------------|---------------|---------------|----------|----------------------|
| Model                                      | <i>K</i>  | AIC            | LL            | $\chi^2$      | df       | $\text{Pr}(>\chi^2)$ |
| Constant                                   | 4         | -1197.7        | 602.83        |               |          |                      |
| First-order polynomial                     | 9         | -1447.3        | 732.67        | 259.679       | 5        | <0.001               |
| <b>Second-order polynomials</b>            | <b>16</b> | <b>-1448.1</b> | <b>740.07</b> | <b>14.792</b> | <b>7</b> | <b>0.039</b>         |
| Third-order polynomials                    | 17        | -1447.1        | 740.57        | 1.011         | 1        | 0.315                |
| Fourth-order polynomials                   | 18        | -1445.8        | 740.87        | 0.607         | 1        | 0.436                |
| <i>Sex effect</i>                          |           |                |               |               |          |                      |
| Model                                      | <i>K</i>  | AIC            | LL            | $\chi^2$      | df       | $\text{Pr}(>\chi^2)$ |
| <b>Baseline</b>                            | <b>16</b> | <b>-611.00</b> | <b>321.50</b> |               |          |                      |
| Sex (additive)                             | 17        | -609.86        | 321.93        | 0.858         | 1        | 0.354                |
| Sex (multiplicative)                       | 19        | -607.32        | 322.66        | 1.463         | 2        | 0.481                |
| <i>Effect of the start date of nesting</i> |           |                |               |               |          |                      |
| Model                                      | <i>K</i>  | AIC            | LL            | $\chi^2$      | df       | $\text{Pr}(>\chi^2)$ |
| <b>Baseline</b>                            | <b>16</b> | <b>-1448.1</b> | <b>740.07</b> |               |          |                      |
| Start (additive)                           | 17        | -1446.7        | 740.35        | 0.576         | 1        | 0.448                |
| Start (multiplicative)                     | 19        | -1448.2        | 743.10        | 5.503         | 2        | 0.064                |

497 **Table 3. Coefficients and their significance of the best model for the frequency of foraging**  
498 **trips during the post-hatching phase in Wood Stork (*Mycteria Americana*).**

| Variable                | Estimate | Std Error | df      | <i>t</i> | Pr(>  <i>t</i>  ) |
|-------------------------|----------|-----------|---------|----------|-------------------|
| Intercept               | 0.225    | 0.006     | 47.1200 | 38.064   | <0.001            |
| First-order polynomial  | 1.887    | 0.1403    | 42.630  | 13.501   | <0.001            |
| Second-order polynomial | 0.034    | 0.128     | 67.220  | 0.265    | 0.792             |

499 **Table 4. Model selection for duration of foraging trips by Wood Storks (*Mycteria Ameri-***  
 500 ***cana*). SSR and SSE are the residual and explained sums of squares, respectively with**  
 501 **their associated degrees of freedom, and  $F$ , and  $\text{Pr}(>F)$  indicate the statistic and  $P$ -value**  
 502 **for the comparison between each model and the previous one. The selected model is indi-**  
 503 **cated in bold.**

| <i>General shape</i>     |                 |            |                 |    |       |                 |
|--------------------------|-----------------|------------|-----------------|----|-------|-----------------|
| Model                    | SS <sub>R</sub> | df         | SS <sub>E</sub> | df | $F$   | $\text{Pr}(>F)$ |
| <b>Constant</b>          | <b>502825</b>   | <b>156</b> |                 |    |       |                 |
| First-order polynomial   | 491459          | 155        | 11366.4         | 1  | 3.612 | 0.059           |
| Second-order polynomials | 487172          | 154        | 4286.4          | 1  | 1.362 | 0.245           |
| Third-order polynomials  | 481410          | 153        | 5762.2          | 1  | 1.831 | 0.178           |
| Fourth-order polynomials | 478286          | 152        | 3124.5          | 1  | 0.993 | 0.320           |

  

| <i>Sex effect</i>    |                 |           |                 |    |       |                 |
|----------------------|-----------------|-----------|-----------------|----|-------|-----------------|
| Model                | SS <sub>R</sub> | df        | SS <sub>E</sub> | df | $F$   | $\text{Pr}(>F)$ |
| <b>Baseline</b>      | <b>236086</b>   | <b>69</b> |                 |    |       |                 |
| Sex (additive)       | 234611          | 68        | 1475.0          | 1  | 0.427 | 0.516           |
| Sex (multiplicative) | 231545          | 67        | 3066.5          | 1  | 0.887 | 0.350           |

  

| <i>Effect of the start date of nesting</i> |                 |            |                 |    |       |                 |
|--------------------------------------------|-----------------|------------|-----------------|----|-------|-----------------|
| Model                                      | SS <sub>R</sub> | df         | SS <sub>E</sub> | df | $F$   | $\text{Pr}(>F)$ |
| <b>Baseline</b>                            | <b>491459</b>   | <b>155</b> |                 |    |       |                 |
| Start (additive)                           | 488720          | 154        | 2738.7          | 1  | 0.872 | 0.352           |
| Start (multiplicative)                     | 480680          | 153        | 8040.3          | 1  | 2.559 | 0.112           |

504 **Table 5. Coefficients and their significance of the best model for the duration of foraging**  
505 **trips during the post-hatching phase in Wood Stork (*Mycteria Americana*).**

| Variable  | Estimate | Std Error | <i>t</i> | Pr(>  <i>t</i>  ) |
|-----------|----------|-----------|----------|-------------------|
| Intercept | 141.384  | 9.442     | 14.974   | <0.001            |
| Weeks     | -2.629   | 1.388     | -1.893   | 0.060             |

506 **Table 6. Coefficients and their significance of the logistic model for reproductive success**  
507 **ratio in Wood Stork (*Mycteria Americana*).**

| Variable    | Estimate | Std. Error | $z$    | Pr(>  $z$  ) |
|-------------|----------|------------|--------|--------------|
| Intercept   | -3.481   | 1.593      | -2.185 | 0.029        |
| Early stage | 8.527    | 8.320      | 1.025  | 0.306        |
| Late stage  | 17.828   | 6.086      | 2.929  | 0.003        |

508 **Table 7. Coefficients and their significance of the semi-parametric proportional hazards**  
509 **(SPPH) model applied to the risk of takeovers of Wood Stork (*Mycteria Americana*) nests.**  
510 **Exponentiated coefficients can be interpreted as multiplicative effects on the hazard, i.e.**  
511 **the instantaneous risk of takeover, holding other covariates constant. For instance, late**  
512 **starters have a risk more than twice as high as early starters ( $e^\beta = 2.135$ ).**

| Variable              | $\beta$ | $e^\beta$ | Std. Error | $z$   | $\Pr(> z )$ |
|-----------------------|---------|-----------|------------|-------|-------------|
| Presence $\geq 1$ ad. | 0.029   | 1.030     | 0.023      | 1.289 | 0.197       |
| Presence 2 ad.        | 0.017   | 1.018     | 0.007      | 2.506 | 0.012       |
| Late-starters         | 0.759   | 2.135     | 0.385      | 1.971 | 0.049       |

513

## Figure captions

514 **Fig. 1. Location of study sites in south Florida, north of Miami and Fort Lauderdale. Pro-**  
515 **ected and natural areas are presented in light gray; roads and interstates as grey and**  
516 **black lines, respectively.**

517 **Fig. 2. Evolution of nest status during the nesting season in Wood Stork (*Mycteria Ameri-***  
518 **cana) ( $n = 61$ ). The color indicates the phases of each pair in the nest: Building phase**  
519 **(stripped light gray), Incubation phase (dark gray), Post-hatching phase (light gray),**  
520 **Abandon (stripped dark gray). All 27 takeovers are indicated by black crosses.**

521 **Fig. 3. Frequency (A) and duration (B) of foraging trips through time during the post-**  
522 **hatching phase in Wood Stork (*Mycteria Americana*) ( $n = 157$ ,  $r^2 = 0,22$  and  $r^2 = 0,02$  re-**  
523 **spectively). Point represent average values for each week since hatching  $\pm$  SE, and the**  
524 **light gray line represents the best model fit (see text for details).**

525 **Fig. 4. Reproductive success ratio as a function of frequency of foraging trips in late pre-**  
526 **flight stage in Wood Stork (*Mycteria Americana*) ( $n = 29$ ,  $r^2 = 0,43$ ). The color of dots**  
527 **indicates the number of fledglings in each nest (diamonds = 3; crosses = 2; circle = 1) and**  
528 **the blue line indicates the logistic fit (with 95 % confidence interval).**

529 **Fig. 5. (A) Nest attendance by adult Wood Storks (*Mycteria Americana*) through time ( $n$**   
530 **= 79 pairs). The color indicates nest attendance of two adults (dark gray), one adult (light**  
531 **gray) or no adults (stripped light gray). B: building phase; I: incubation phase; H: post-**  
532 **hatching phase. The average fledge age is between 50 to 60 days (Kahl 1971, Coulter *et al.***  
533 **1999, Bryan *et al.* 2005). (B) Kaplan-Meier survival curve (with confidence interval) for**  
534 **the risk of nest takeovers in 79 Wood Stork nests as a function of the week of the year ( $n$**   
535 **= 79 pairs), or (C) week since start of incubation ( $n = 79$  pairs). Colors further distinguish**  
536 **between early pairs (dashed lined, top), and late pairs (dotted line, bottom).**



537 Figures

538 Figure 1

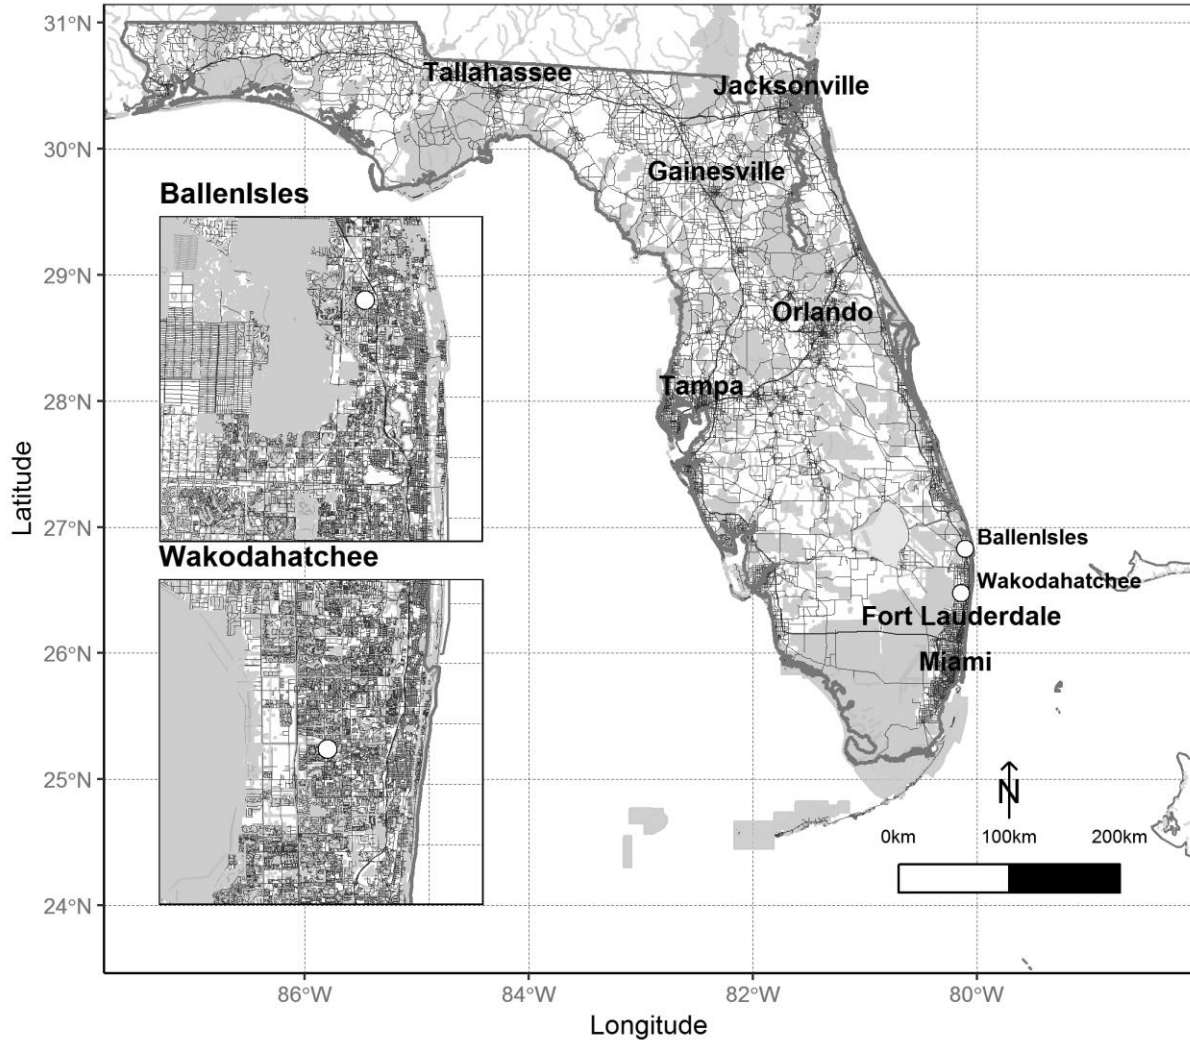

539 Figure 2

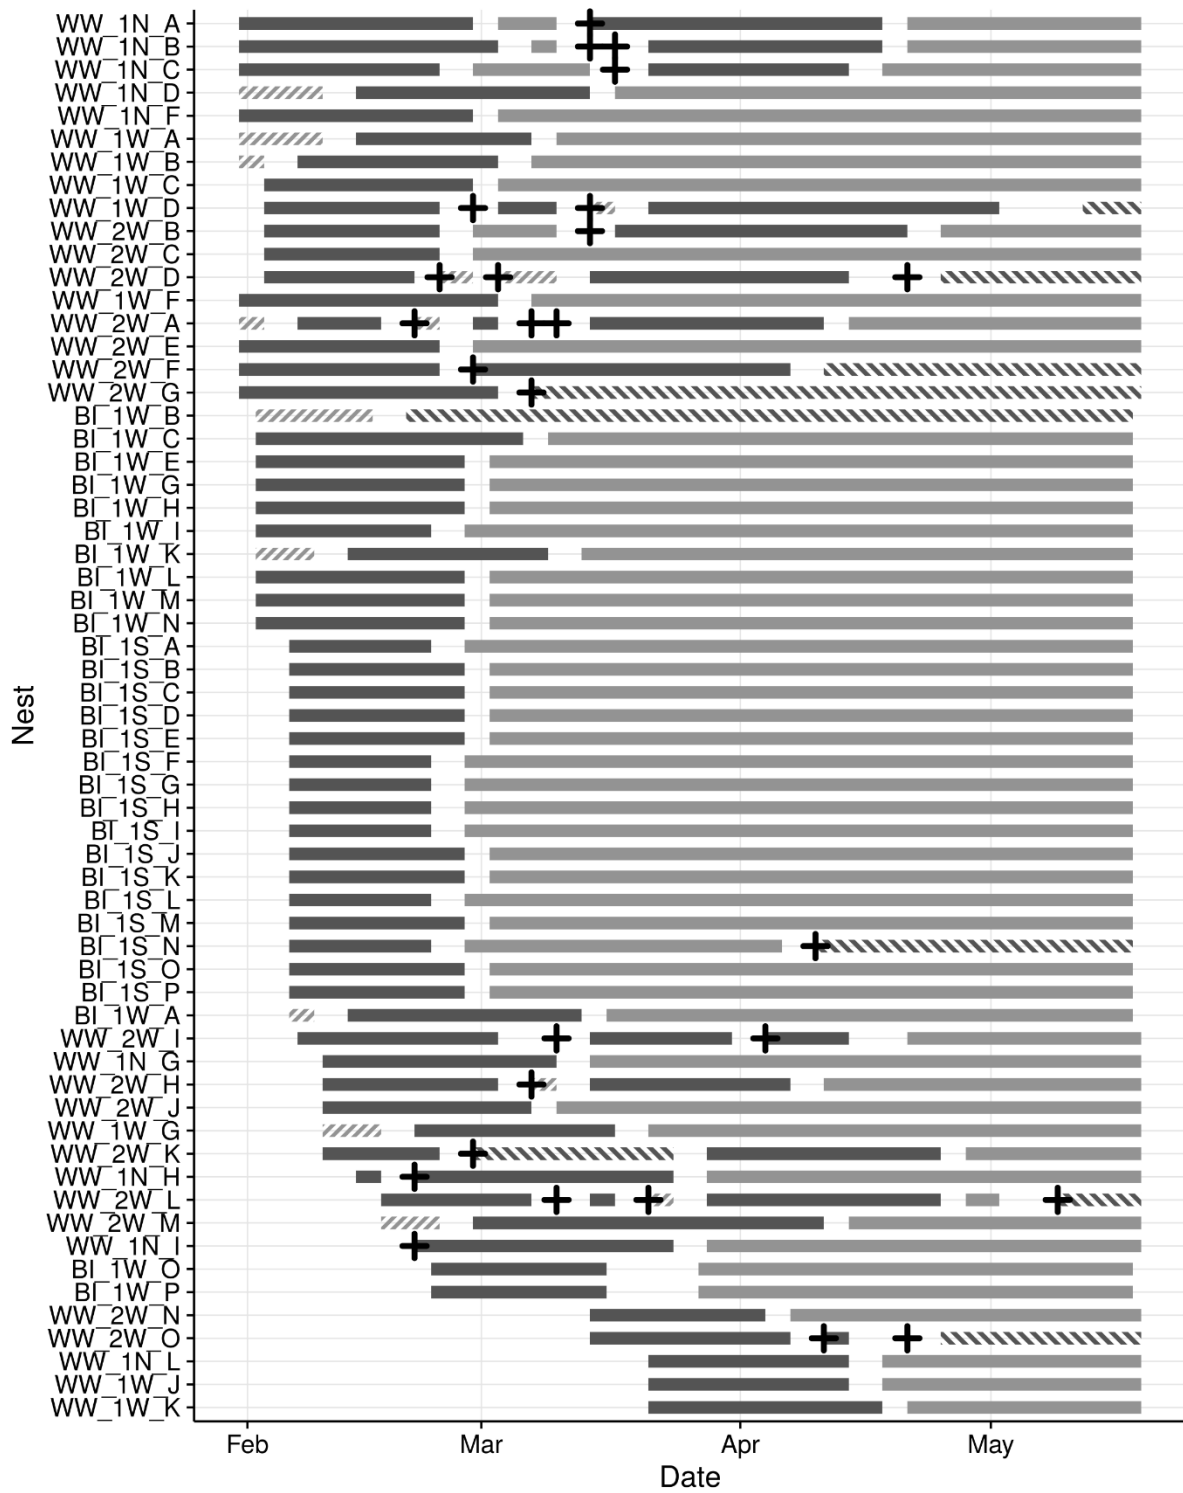

540 Figure 3

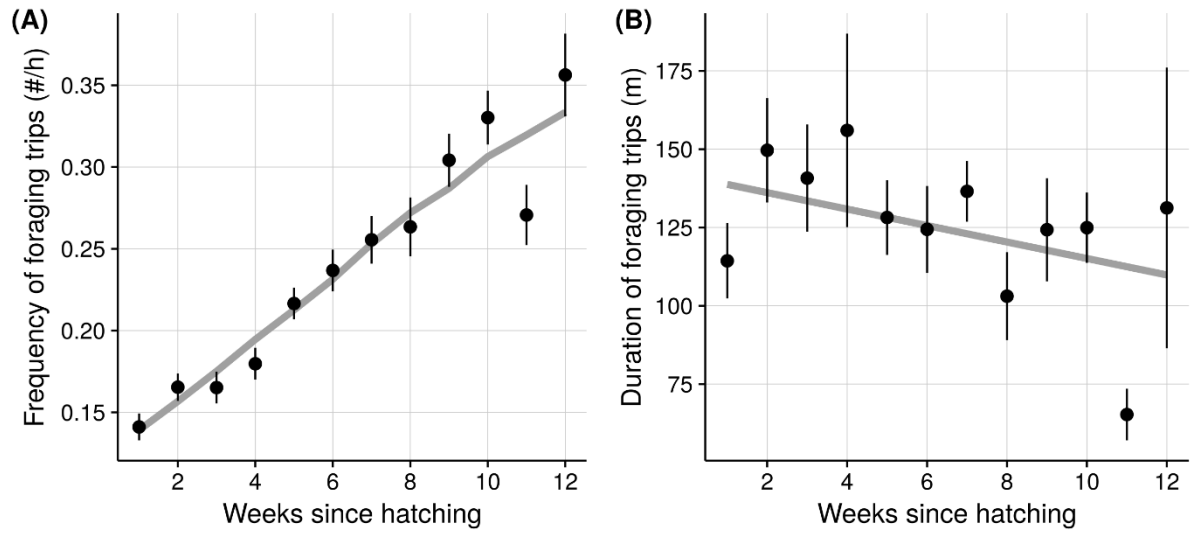

541 Figure 4

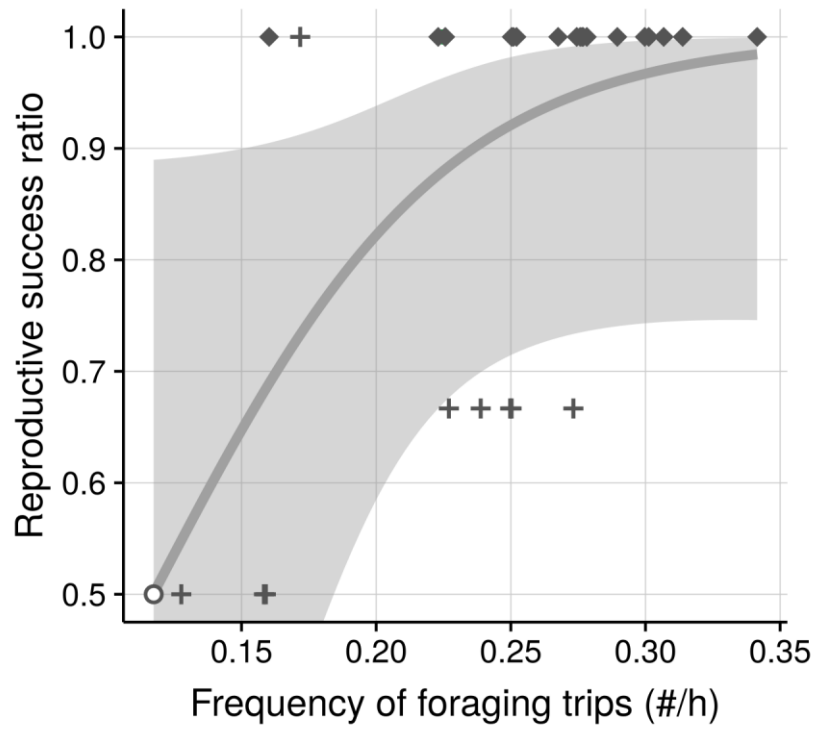

542 Figure 5

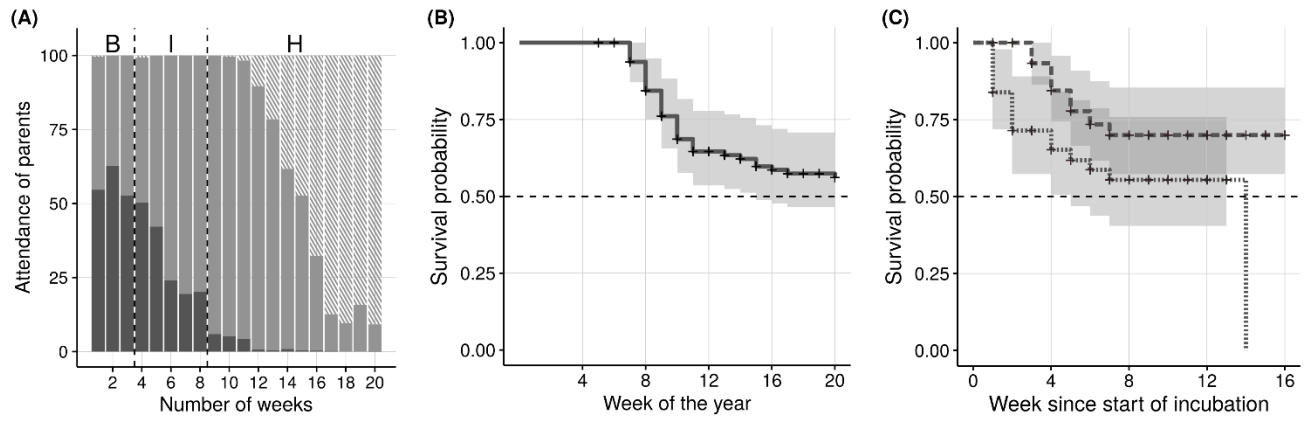

543

**Plate 1.**

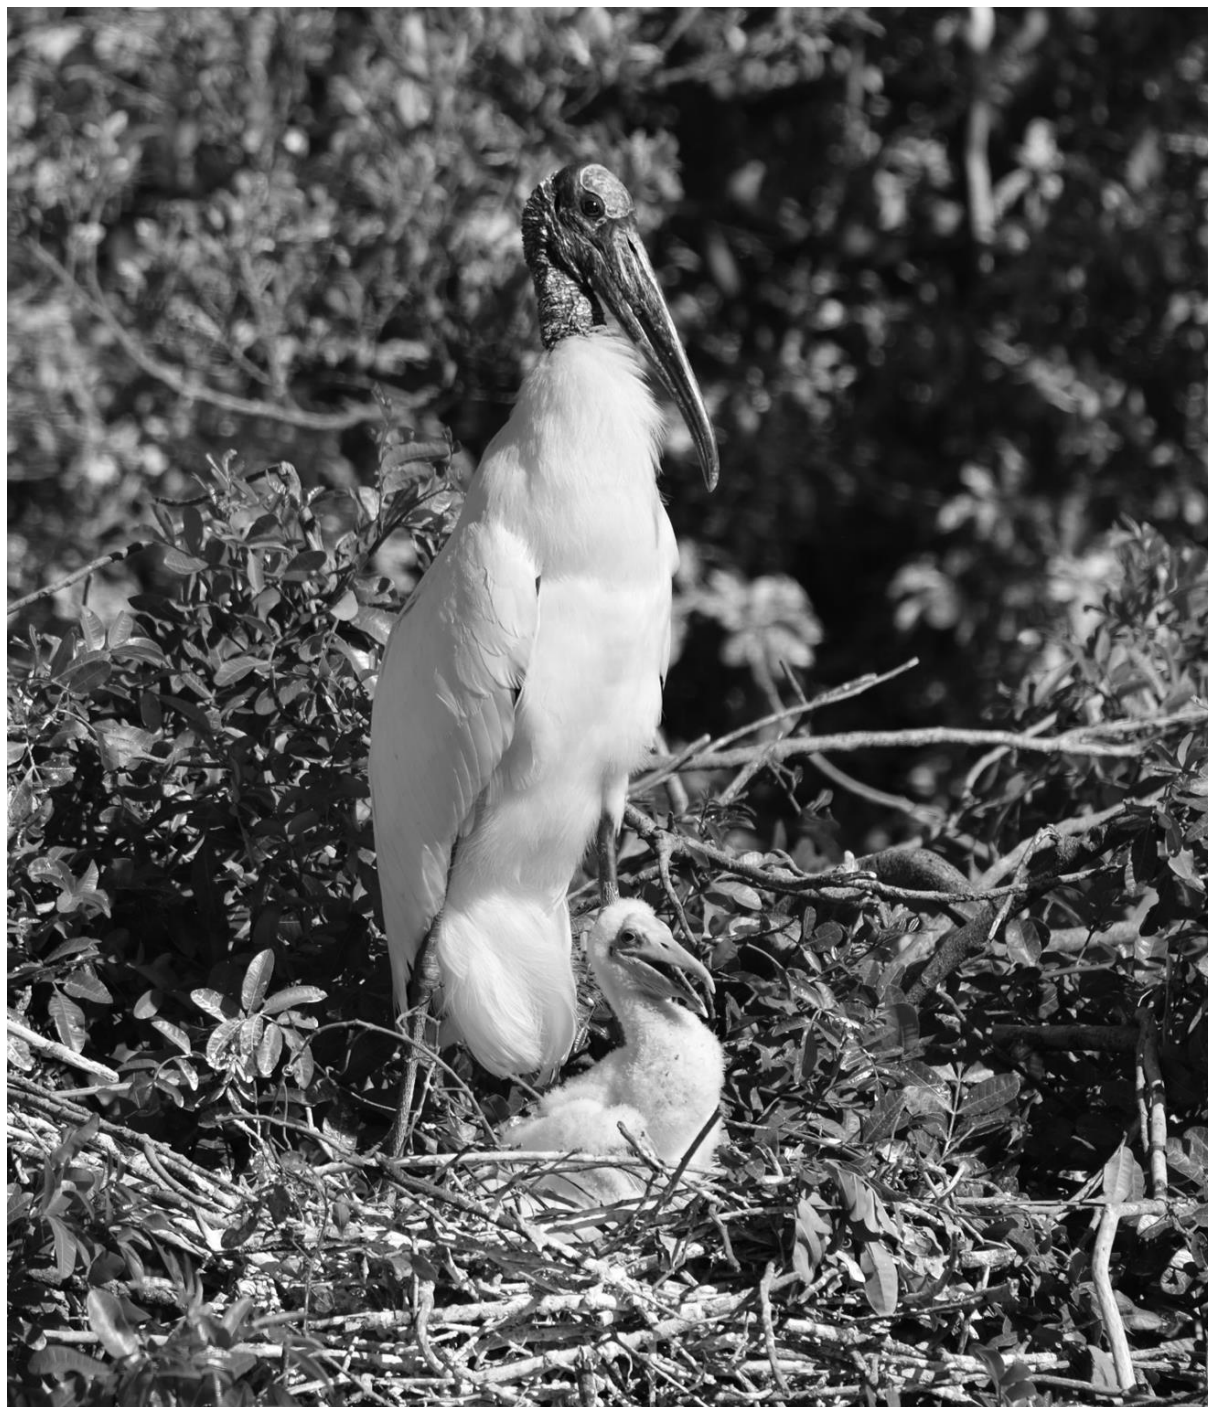

Source: https://www.biorxiv.org/content/10.1101/592840v2.full.pdf
